# Supplementary material for: The Effect of the Pore Entrance on Particle Motion in Slit Pores: Implications for Ultrathin Membranes
Source: PubMed Central journal article supplement (PMC5618127; doi:10.3390/membranes7030042), 2017-08-10
Supplement: membranes-07-00042-s001.pdf [file membranes-07-00042-s001.pdf]

## Supplementary Information

The Effect of the Pore Entrance on Particle Motion in Slit Pores: Implications for Ultrathin Membranes

Armin Delavari and Ruth Baltus

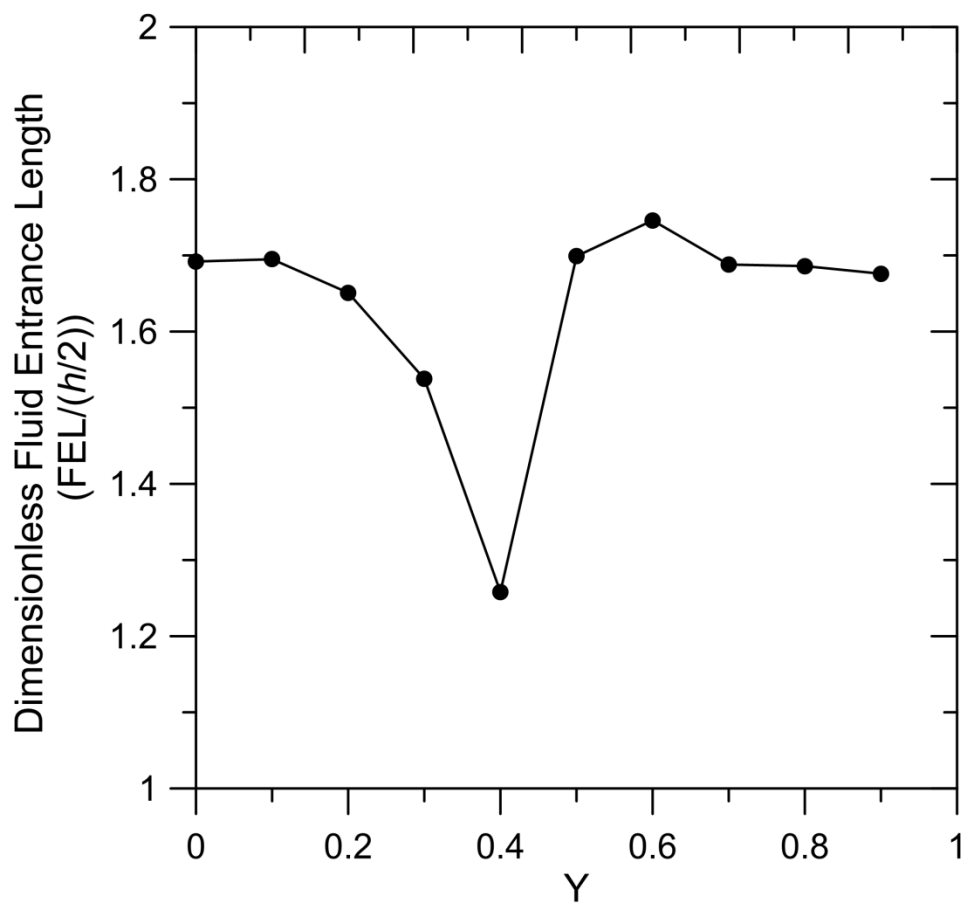

**Figure S1** Dimensionless FEL as a function of cross-pore position ( $Y$ )
